# Supplementary material for: The GOAT-Ghrelin System Is Not Essential for Hypoglycemia Prevention during Prolonged Calorie Restriction
Source: PubMed Central journal article supplement (PMC3283719; doi:10.1371/journal.pone.0032100), 2012-02-21

Figure S2

## Male

**A**

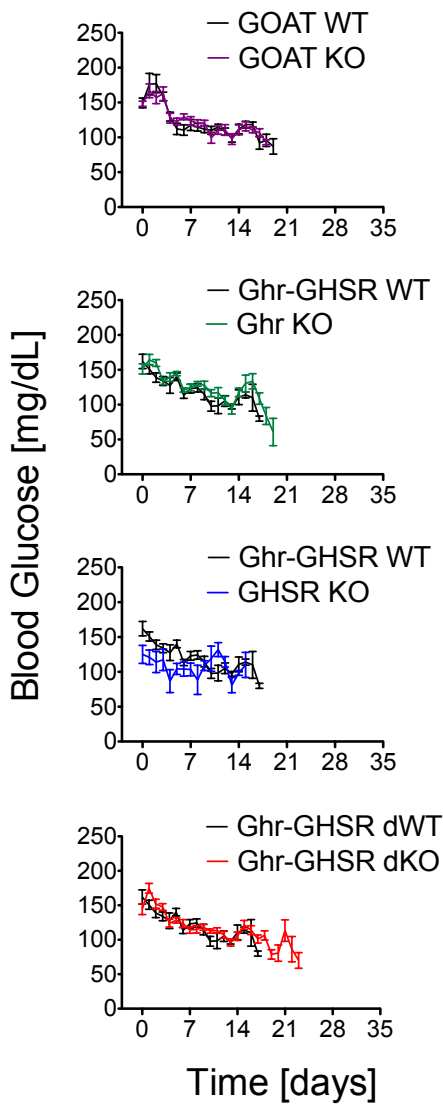

## Female

**B**

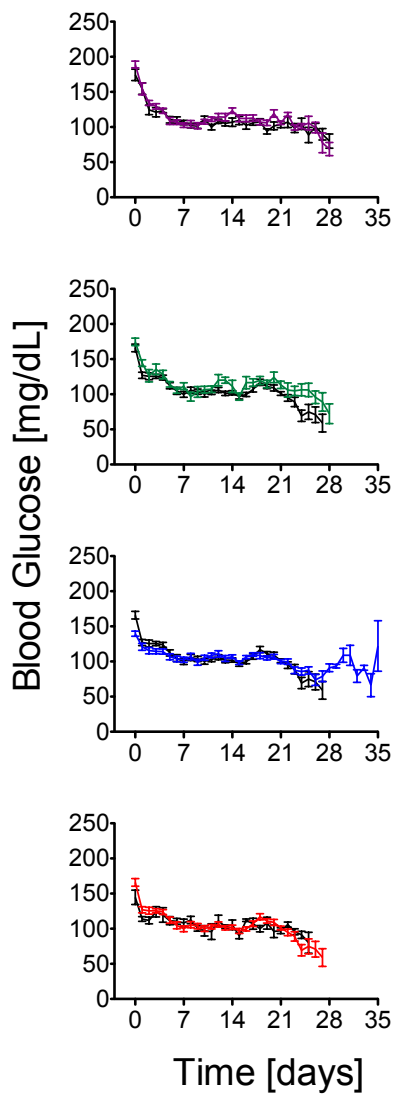

Supplement: pone.0032100.s002.pdf [file pone.0032100.s002.pdf]
